# Supplementary material for: Superior MRI outcomes with alemtuzumab compared with subcutaneous interferon β-1a in MS
Source: PubMed Central journal article supplement — Neurology. 2016 Oct 4;87(14):1464–72. doi: 10.1212/WNL.0000000000003169 (PMC5075976; doi:10.1212/wnl.0000000000003169), 2016-10-04
Supplement: supp_WNL.0000000000003169_Supplementary_Materials.pdf [file supp_WNL.0000000000003169_Supplementary_Materials.pdf]

# Figure e-1

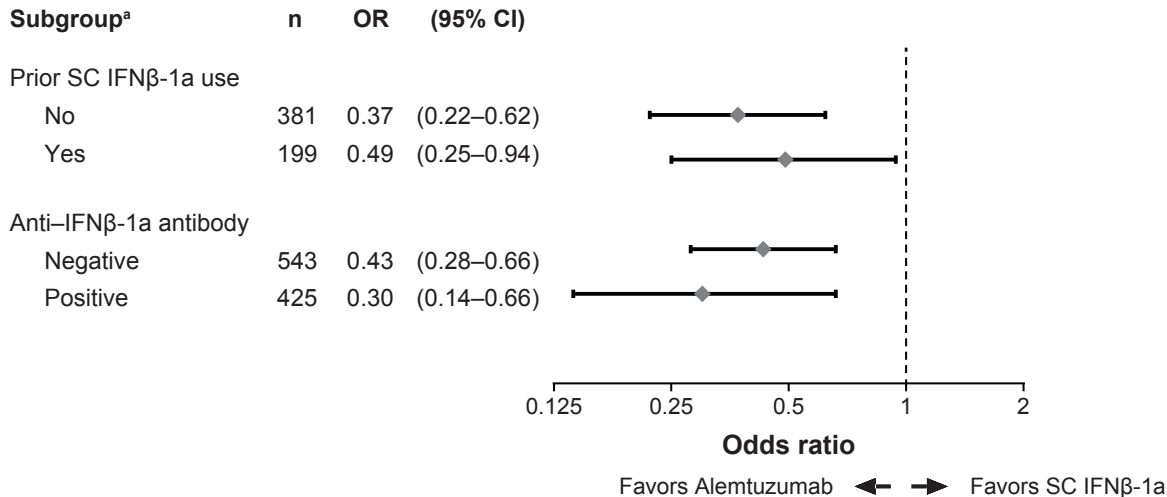

**Figure e-1 Forest plot of the influence of prior SC IFN $\beta$ -1a use and baseline anti-IFN $\beta$ -1a antibodies on gadolinium-enhancing lesion activity in CARE-MS II patients.**

<sup>a</sup>All patients are stratified for the prior subcutaneous interferon beta-1a (SC IFN $\beta$ -1a) use analysis. For the anti-IFN $\beta$ -1a antibody analysis, only SC IFN $\beta$ -1a-treated patients are stratified by antibody status and compared to all alemtuzumab-treated patients. OR = odds ratio.

## Figure e-2

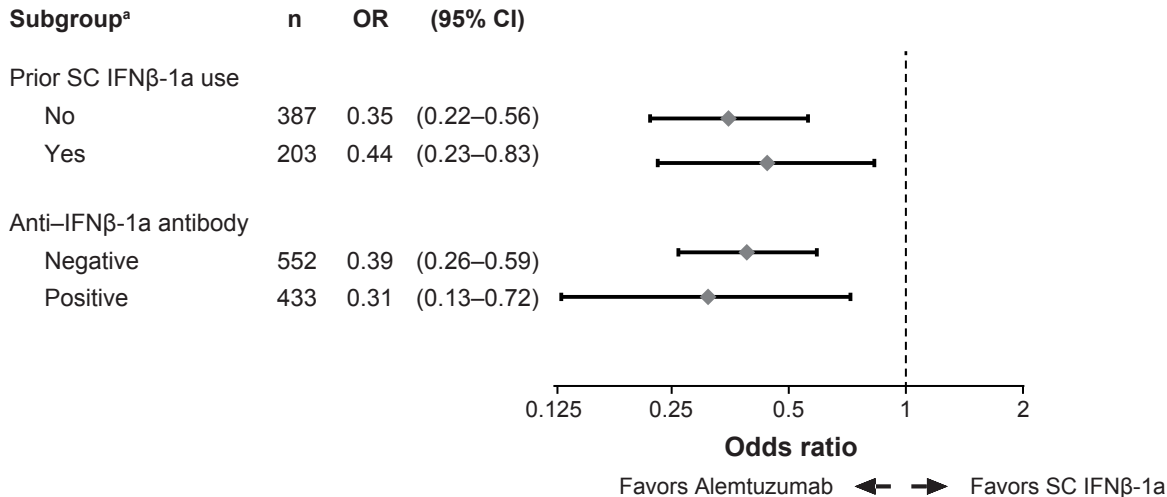

**Figure e-2 Forest plot of the influence of prior SC IFN $\beta$ -1a use and baseline anti-IFN $\beta$ -1a antibodies on new or enlarging T2 lesion activity in CARE-MS II patients.**

<sup>a</sup>All patients are stratified for the prior subcutaneous interferon beta-1a (SC IFN $\beta$ -1a) use analysis. For the anti-IFN $\beta$ -1a antibody analysis, only SC IFN $\beta$ -1a-treated patients are stratified by antibody status and compared to all alemtuzumab-treated patients. OR = odds ratio.

**Table e-1 MRI lesion-based outcomes for treatment-naive patients (CARE-MS I) and patients who relapsed on prior therapy (CARE-MS II)**

|                                                       | Treatment-naive<br>(CARE-MS I) |                  |                | Relapsed on prior therapy<br>(CARE-MS II) |                  |                |
|-------------------------------------------------------|--------------------------------|------------------|----------------|-------------------------------------------|------------------|----------------|
|                                                       | SC IFN $\beta$ -1a             | Alemtuzumab      | <i>p</i> value | SC IFN $\beta$ -1a                        | Alemtuzumab      | <i>p</i> value |
| <b>New or enlarging T2 hyperintense lesion counts</b> |                                |                  |                |                                           |                  |                |
| <b>Year 0–1</b>                                       |                                |                  |                |                                           |                  |                |
| Patients with data, n                                 | 174                            | 370              |                | 189                                       | 414              |                |
| Patients with lesions, %                              | 47.7                           | 40.0             |                | 56.1                                      | 38.9             |                |
| OR (95% CI)                                           |                                | 0.70 (0.48–1.02) |                |                                           | 0.47 (0.33–0.68) |                |
| Risk reduction, %                                     |                                | 30               | 0.0653         |                                           | 53               | <0.0001        |
| Mean (SD)                                             | 1.63 (2.68)                    | 1.60 (3.83)      | 0.4092         | 4.26 (9.84)                               | 2.16 (7.63)      | 0.0034         |
| Median (range)                                        | 0.0 (0.0–13)                   | 0.0 (0.0–35)     |                | 1.0 (0.0–79)                              | 0.0 (0.0–101)    |                |
| <b>Years 1–2</b>                                      |                                |                  |                |                                           |                  |                |
| Patients with data, n                                 | 175                            | 364              |                | 189                                       | 404              |                |
| Patients with lesions, %                              | 40.6                           | 23.1             |                | 52.4                                      | 24.3             |                |
| OR (95% CI)                                           |                                | 0.43 (0.29–0.64) |                |                                           | 0.27 (0.19–0.39) |                |
| Risk reduction, %                                     |                                | 57               | <0.0001        |                                           | 73               | <0.0001        |

|                                   | Treatment-naive<br>(CARE-MS I) |                  |         | Relapsed on prior therapy<br>(CARE-MS II) |                  |         |
|-----------------------------------|--------------------------------|------------------|---------|-------------------------------------------|------------------|---------|
|                                   | SC IFN $\beta$ -1a             | Alemtuzumab      | p value | SC IFN $\beta$ -1a                        | Alemtuzumab      | p value |
| Mean (SD)                         | 1.61 (3.75)                    | 0.67 (2.62)      | 0.0006  | 4.09 (9.07)                               | 1.38 (5.75)      | <0.0001 |
| Median (range)                    | 0.0 (0.0–27)                   | 0.0 (0.0–28)     |         | 1.0 (0.0–58)                              | 0.0 (0.0–66)     |         |
| <b>Years 0–2</b>                  |                                |                  |         |                                           |                  |         |
| Patients with data, n             | 172                            | 363              |         | 187                                       | 403              |         |
| Patients with lesions, %          | 57.6                           | 48.5             |         | 67.9                                      | 46.2             |         |
| OR (95% CI)                       |                                | 0.66 (0.45–0.97) |         |                                           | 0.38 (0.26–0.55) |         |
| Risk reduction, %                 |                                | 34               | 0.0352  |                                           | 62               | <0.0001 |
| Mean (SD)                         | 3.15 (5.32)                    | 2.29 (6.05)      | 0.0288  | 8.44 (17.5)                               | 3.59 (11.8)      | <0.0001 |
| Median (range)                    | 1.0 (0.0–29)                   | 0.0 (0.0–63)     |         | 3.0 (0.0–116)                             | 0.0 (0.0–125)    |         |
| <b>Gd-enhancing lesion counts</b> |                                |                  |         |                                           |                  |         |
| <b>Year 0–1</b>                   |                                |                  |         |                                           |                  |         |
| Patients with data, n             | 176                            | 370              |         | 190                                       | 412              |         |
| Patients with lesions, %          | 12.5                           | 11.9             |         | 23.2                                      | 14.1             |         |
| OR (95% CI)                       |                                | 0.92 (0.52–1.63) |         |                                           | 0.51 (0.32–0.80) |         |
| Risk reduction, %                 |                                | 8                | 0.7762  |                                           | 49               | 0.0036  |
| Mean (SD)                         | 0.27 (1.16)                    | 0.41 (1.68)      | 0.5140  | 1.04 (4.32)                               | 0.63 (2.80)      | 0.7663  |

|                                        | Treatment-naive<br>(CARE-MS I) |                  |         | Relapsed on prior therapy<br>(CARE-MS II) |                        |         |
|----------------------------------------|--------------------------------|------------------|---------|-------------------------------------------|------------------------|---------|
|                                        | SC IFN $\beta$ -1a             | Alemtuzumab      | p value | SC IFN $\beta$ -1a                        | Alemtuzumab            | p value |
| Median (range)                         | 0.0 (0.0–13.0)                 | 0.0 (0.0–18.0)   |         | 0.0 (0.0–44.0)                            | 0.0 (0.0–28.0)         |         |
| <b>Years 1–2</b>                       |                                |                  |         |                                           |                        |         |
| Patients with data, n                  | 178                            | 366              |         | 190                                       | 410                    |         |
| Patients with lesions %                | 19.1                           | 7.1              |         | 23.2                                      | 9.3                    |         |
| OR (95% CI)                            |                                | 0.30 (0.17–0.53) |         |                                           | 0.31 (0.19–0.51)       |         |
| Risk reduction, %                      |                                | 70               | <0.0001 |                                           | 69                     | <0.0001 |
| Mean (SD)                              | 0.33 (0.98)                    | 0.16 (0.76)      | 0.0214  | 1.11 (4.12)                               | 0.32 (1.46)            | 0.0087  |
| Median (range)                         | 0.0 (0.0–8.0)                  | 0.0 (0.0–8.0)    |         | 0.0 (0.0–44.0)                            | 0.0 (0.0–16.0)         |         |
| <b>T2 hyperintense lesion volume</b>   |                                |                  |         |                                           |                        |         |
| <b>Year 0–1</b>                        |                                |                  |         |                                           |                        |         |
| Patients with data, n                  | 174                            | 370              |         | 189                                       | 414                    |         |
| Mean change from baseline (SD)         | -1.00 (3.50)                   | -0.69 (2.17)     |         | -0.10 (2.45)                              | -0.30 (2.60)           |         |
| Median change from baseline<br>(range) | -0.2 (-38.5–2.3)               | -0.2 (-22.1–8.7) |         | -0.02 (-15.5–<br>8.1)                     | -0.07 (-27.3–<br>16.9) |         |
| Mean % change from baseline<br>(SD)    | -10.5 (20.8)                   | -9.0 (19.3)      |         | 0.06 (22.3)                               | -0.82 (22.4)           |         |

|                                          | Treatment-naive<br>(CARE-MS I) |                  |         | Relapsed on prior therapy<br>(CARE-MS II) |                        |         |
|------------------------------------------|--------------------------------|------------------|---------|-------------------------------------------|------------------------|---------|
|                                          | SC IFN $\beta$ -1a             | Alemtuzumab      | p value | SC IFN $\beta$ -1a                        | Alemtuzumab            | p value |
| Median % change from baseline<br>(range) | -8.4 (-72.2–<br>141)           | -7.1 (-81.7–166) | 0.1636  | -0.96 (-82.0–<br>77.9)                    | -2.22 (-76.9–144)      | 0.2737  |
| <b>Years 1–2</b>                         |                                |                  |         |                                           |                        |         |
| Patients with data, n                    | 173                            | 364              |         | 189                                       | 405                    |         |
| Mean change from Y1 (SD)                 | 0.20 (1.09)                    | -0.15 (1.23)     |         | 0.15 (1.13)                               | -0.10 (1.93)           |         |
| Median change from Y1 (range)            | 0.0 (-4.0–7.4)                 | 0.0 (-10.2–7.0)  |         | 0.03 (-2.99–<br>6.21)                     | 0.0 (-19.2–5.57)       |         |
| Mean % change from Y1 (SD)               | 2.99 (23.1)                    | -0.92 (19.0)     |         | 3.35 (16.4)                               | 0.46 (18.1)            |         |
| Median % change from Y1<br>(range)       | 0.0 (-52.1–171)                | -1.8 (-83.2–196) | 0.0364  | 0.87 (-58.8–<br>91.8)                     | 0.0 (-55.3–207)        | 0.0261  |
| <b>Years 0–2</b>                         |                                |                  |         |                                           |                        |         |
| Patients with data, n                    | 177                            | 364              |         | 190                                       | 412                    |         |
| Mean change from baseline (SD)           | -0.73 (3.61)                   | -0.84 (2.31)     |         | 0.02 (2.56)                               | -0.41 (3.25)           |         |
| Median change from baseline<br>(range)   | -0.2 (-38.8–8.3)               | -0.2 (-23.7–6.1) |         | -0.03 (-15.7–<br>8.06)                    | -0.04 (-37.3–<br>12.8) |         |

|                                               | Treatment-naive<br>(CARE-MS I) |                  |         | Relapsed on prior therapy<br>(CARE-MS II) |                   |         |
|-----------------------------------------------|--------------------------------|------------------|---------|-------------------------------------------|-------------------|---------|
|                                               | SC IFN $\beta$ -1a             | Alemtuzumab      | p value | SC IFN $\beta$ -1a                        | Alemtuzumab       | p value |
| Mean % change from baseline<br>(SD)           | -6.7 (32.4)                    | -10.3 (22.6)     |         | 2.41 (26.5)                               | -1.12 (24.4)      |         |
| Median % change from baseline<br>(range)      | -6.5 (-74.6–<br>220)           | -9.3 (-89.2–143) | 0.3080  | -1.23 (-82.7–<br>162)                     | -1.27 (-74.5–155) | 0.1371  |
| <b>New T1 hypointense lesions</b>             |                                |                  |         |                                           |                   |         |
| <b>Year 0–1</b>                               |                                |                  |         |                                           |                   |         |
| Patients with data, n                         | 174                            | 370              |         | 189                                       | 414               |         |
| Patients with lesions %                       | 25.3                           | 19.5             |         | 28.0                                      | 17.1              |         |
| OR (95% CI)                                   |                                | 0.68 (0.43–1.08) |         |                                           | 0.49 (0.32–0.74)  |         |
| Risk reduction, %                             |                                | 32               | 0.1024  |                                           | 51                | 0.0008  |
| Mean change from baseline (SD)                | -0.13 (1.07)                   | -0.17 (0.98)     |         | 0.10 (0.93)                               | -0.01 (1.21)      |         |
| Median volume change from<br>baseline (range) | 0.0 (-10.0–3.4)                | 0.0 (-8.6–3.3)   |         | 0.01 (-2.98–<br>6.65)                     | 0.00 (-12.9–7.66) |         |
| Mean % volume change from<br>baseline (SD)    | 38.9 (423)                     | -3.36 (117)      |         | 18.7 (74.8)                               | 4.08 (62.3)       |         |

|                                              | Treatment-naive<br>(CARE-MS I) |                   |         | Relapsed on prior therapy<br>(CARE-MS II) |                  |         |
|----------------------------------------------|--------------------------------|-------------------|---------|-------------------------------------------|------------------|---------|
|                                              | SC IFN $\beta$ -1a             | Alemtuzumab       | p value | SC IFN $\beta$ -1a                        | Alemtuzumab      | p value |
| Median % volume change from baseline (range) | -9.5 (-100–5113)               | -15.0 (-100–1503) | 0.0464  | 4.66 (-100–464)                           | 0.00 (-100–429)  | 0.0300  |
| <b>Years 1–2</b>                             |                                |                   |         |                                           |                  |         |
| Patients with data, n                        | 176                            | 365               |         | 189                                       | 404              |         |
| Patients with lesions %                      | 18.2                           | 6.8               |         | 25.9                                      | 7.7              |         |
| OR (95% CI)                                  |                                | 0.33 (0.19–0.58)  |         |                                           | 0.21 (0.13–0.36) |         |
| Risk reduction, %                            |                                | 67                | 0.0001  |                                           | 79               | <0.0001 |
| Mean volume change from Y1 (SD)              | 0.09 (0.55)                    | 0.02 (0.49)       |         | 0.09 (1.03)                               | 0.03 (1.01)      |         |
| Median volume change from Y1 (range)         | 0.0 (1.2–3.8)                  | 0.0 (-3.0–3.1)    |         | 0.00 (-1.6–13.1)                          | 0.00 (-4.0–9.9)  |         |
| Mean % volume change from Y1 (SD)            | 20.8 (80.2)                    | 20.3 (205)        |         | 18.7 (101)                                | 21.4 (111)       |         |
| Median % volume change from Y1 (range)       | 4.1 (-100–472)                 | 0.0 (-100–3146)   | 0.0387  | 0.00 (-100–855)                           | 0.00 (-100–1018) | 0.7692  |
| <b>Years 0–2</b>                             |                                |                   |         |                                           |                  |         |



|                                                                         | Treatment-naive<br>(CARE-MS I) |                       |         | Relapsed on prior therapy<br>(CARE-MS II) |                  |         |
|-------------------------------------------------------------------------|--------------------------------|-----------------------|---------|-------------------------------------------|------------------|---------|
|                                                                         | SC IFN $\beta$ -1a             | Alemtuzumab           | p value | SC IFN $\beta$ -1a                        | Alemtuzumab      | p value |
| Patients with data, n                                                   | 177                            | 364                   |         | 190                                       | 412              |         |
| Patients with lesions %                                                 | 31.4                           | 24.0                  |         | 38.0                                      | 19.9             |         |
| OR (95% CI)                                                             |                                | 0.66 (0.43–1.01)      |         |                                           | 0.37 (0.25–0.55) |         |
| Risk reduction, %                                                       |                                | 34                    | 0.0545  |                                           | 63               | <0.0001 |
| Mean change from baseline (SD)                                          | 0.01 (1.27)                    | -0.20 (1.13)          |         | 0.21 (1.51)                               | 0.03 (1.17)      |         |
| Median change from baseline<br>(range)                                  | 0.0 (-9.7–9.5)                 | 0.0 (-10.1–3.6)       |         | 0.01 (-2.97–<br>15.8)                     | 0.00 (7.28–10.0) |         |
| Mean % change from baseline<br>(SD)                                     | 68.6 (549)                     | -4.84 (106)           |         | 27.3 (98.7)                               | 17.7 (112)       |         |
| Median % change from baseline<br>(range)                                | -0.1 (-100–<br>6633)           | -21.6 (-100–<br>1352) | 0.0018  | 5.08 (-100–518)                           | 0.00 (-100–867)  | 0.1489  |
| <b>Conversion of Gd-enhancing lesions to T1 hypointense black holes</b> |                                |                       |         |                                           |                  |         |
| <b>Year 0–1<sup>a</sup></b>                                             |                                |                       |         |                                           |                  |         |
| Patients with data, n                                                   | 88                             | 170                   |         | 82                                        | 174              |         |
| % Conversion from baseline,<br>mean (SD)                                | 19.7 (30.7)                    | 21.2 (32.5)           |         | 20.7 (30.8)                               | 18.1 (29.7)      |         |

|                                         | Treatment-naive<br>(CARE-MS I) |                  |         | Relapsed on prior therapy<br>(CARE-MS II) |                  |         |
|-----------------------------------------|--------------------------------|------------------|---------|-------------------------------------------|------------------|---------|
|                                         | SC IFN $\beta$ -1a             | Alemtuzumab      | p value | SC IFN $\beta$ -1a                        | Alemtuzumab      | p value |
| % Conversion, median (range)            | 0.0 (0.0–100)                  | 0.0 (0.0–100)    |         | 0.0 (0.0–100)                             | 0.0 (0.0–100)    |         |
| OR (95% CI)                             |                                | 0.83 (0.56–1.23) |         |                                           | 0.75 (0.50–1.14) |         |
| Risk reduction, %                       |                                | 17               | 0.3512  |                                           | 25               | 0.1777  |
| <b>Years 1–2</b>                        |                                |                  |         |                                           |                  |         |
| Patients with data, n                   | 21                             | 42               |         | 38                                        | 54               |         |
| % Conversion from Y1, mean<br>(SD)      | 24.9 (40.1)                    | 19.7 (34.0)      |         | 27.3 (37.2)                               | 10.7 (25.8)      |         |
| % Conversion from Y1, median<br>(range) | 0.0 (0.0–100)                  | 0.0 (0.0–100)    |         | 0.0 (0.0–100)                             | 0.0 (0.0–100)    |         |
| OR (95% CI)                             |                                | 0.55 (0.24–1.22) |         |                                           | 0.33 (0.15–0.75) |         |
| Risk reduction, %                       |                                | 45               | 0.1389  |                                           | 67               | 0.0078  |

<sup>a</sup> “Black holes” formed at Year 1 are the result of Gd-enhancing lesions present on baseline scans prior to treatment.

CARE-MS = Comparison of Alemtuzumab and Rebif Efficacy in Multiple Sclerosis; CI = confidence interval; Gd = gadolinium; IFN $\beta$ -1a = interferon  $\beta$ -1a; OR = odds ratio; SC = subcutaneous; Y = year.
